# Supplementary material
Source: PubMed Central journal article supplement (PMC3041948)
Supplement: emboj2010349s1.pdf [file emboj2010349s1.pdf]

Maml2 3'UTR-Luc s: 5'- ATAATGCCGGCAAGAAAGGGAAGACAATTTACAAACTC  
as: 5'- ATAATACGCGTTTTTTTGTTTAATCACTAGACACAGCAT

Maml3 3'UTR-Luc s: 5'- ATAATGCCGGCCTCTGCAATTGACGCACATC  
as: 5'- ATAATACGCGTCAGTGGAGCCTCCCTACCT

For **mutagenesis** of the Jag1 3'UTR the following primers were used for PCR:

site 1:

s: 5'- GTTGCTGACTTAGAATCCCTGTAATTTAAGTTTTGACAAGCTGG  
as: 5'- CCAGCTTGTCAAACCTTAAATTACAGGGATTCTAAGTCAGCAAC

site 2:

s: 5'- GCTATGCAAAAAGCTAGTCAACAGTTGTCCCCTTGCAG  
as: 5'- CTGCAAGGGGACAACCTGTTGACTAGCTTTTTGCATAGC

site 3:

s: 5'-GTTCAAGTATTCAACTAGCTTATTAGCCCTAAATGCAGTAGATTAAAAAAAAA  
as: 5'- TTTTTTTTAATCTACTGCATTTAGGGCTAATAAGCTAGTTGAATACTTGAAC

site 4:

s: 5'- CATCAAAGATGCATTTGTATGTTTCATATAATAGGACAATACAAAGTATCTTCAC  
as: 5'- GTGAAGATACTTTGTATTGTCTTATTATATGAACATACAAATGCATCTTTGATG

site 5:

s: 5'- GTAATATTTATTAAATTTTTTTGTATGAAAACATGGATGGCCTCTTCTGAGCTTAC  
as:5'-GTAAGCTCAGAAGAGGCCATCCATGTTTTCATACAAAAAAATTTAATAAATATTAC

For quantitative **real time RT-PCR**, the following primers were used:

hs ZEB1 s: 5'- AAGAATTCACAGTGGAGAGAAGCCA  
as: 5'- CGTTTCTTGCAGTTTGGGCATT

Hey1 s: 5'- AGGGAGCCAGCATGAA  
as: 5'- ATGGAACCTAGAGCCGAA

Jagged1 s: 5'- GAATGGCAACAAAACCTTGCAT  
as:5'- AGCCTTGTTCGGCAAATAGC

Maml2 s: 5'- GTGGTGGGATAAACGGAGAG  
as: 5'- TCTTTTCAAGGAACCCTGGAG

Maml3 s: 5'- CGGAGCAGAGGAACCACA  
as: 5'- CATTCTGCTGGTCTCCATTAAGT

hs E-cadherin s: 5'- GTCCTGGGCAGACTGAATTT  
as: 5'- GACCAAGAAATGGATCTGTGG

hs Vimentin s: 5'- CGAGGAGAGCAGGATTTCTC  
as: 5'- GGTATCAACCAGAGGGAGTGA

hs  $\beta$ -Actin s: 5'- GCCCTGAGGCACTCTTCCA  
as: 5'- TTGCGGATGTCCACGTCA

For transient **knock down** the following siRNAs were used

hs ZEB1 5'- AGAUGAUGAAUGCGAGUCGdTT

Jag1 (a) 5' - GAAUGUGAGGCCAAACCUdTT

Jag1 (b) 5' – CAUCGAUUAUUGUGAGCCUdTT

Maml2 5'- CUCUAACCAGGCUUUGGCAdTT

Maml3 5'- GUUGGAAGGAGCUCGAUCAdTT

si ctrl 5'- GCUACCUGUCCAUGGCCAdTT

The following **antagomirs** were constructed:

anta-mir-200c (1):

5'mU(\*)mC(\*)mCmAmUmCmAmUmUmAmCmCmCmGmGmCmAmGmU(\*)mA(\*)mU(\*)  
mU(\*)mA-3'Cholesterole

anta-mir-200c (2):

5'-mU(\*)mC(\*)mCmAmUmCmAmUmUmAmCmCmCmGmGmCmAmGmUmA(\*)mU(\*)  
mU(\*)mA(\*)-3'Cholesterole

anta-mir-141:

5'-mC(\*)mC(\*)mAmUmCmUmUmUmAmCmCmAmGmAmCmAmGmUmG(\*)mU(\*)  
mU(\*)mA(\*)-3'Cholesterole

anta-mir-ctrl: (see Yi et al., Nature 2008;452:225-9)

5'-mU(\*)mC(\*)mUmCmGmUmGmUmUmCmAmUmAmAmAmCmAmCmU(\*)mU(\*)  
mC(\*) mA(\*)-3'Cholesterole

**Antibodies used in this study:**

For immunohistochemistry (IHC), immunofluorescence (IF) and immunoblots (IB):

|                            |                                   |               |             |
|----------------------------|-----------------------------------|---------------|-------------|
| mouse anti $\beta$ -Actin  | Sigma, #A5541                     | 1:5000        | for IB      |
| rabbit anti Jagged1        | Cell Sig. Tech. . #2620           | 1:500, 1:75   | for IB, IHC |
| rabbit anti Maml2          | Bethyl Lab., #A300-682            | 1:1000        | for IB      |
| rabbit anti Maml3          | Bethyl Lab., #A300-683            | 1:5000        | for IB      |
| rabbit anti Notch1         | Abcam ab8925                      | 1:500         | for IHC     |
| rabbit anti Notch2         | Deciphergen Biotech.<br>#SRP00383 | 1:500         | for IHC, IF |
| mouse anti Vimentin        | Dako, #M0725                      | 1:20          | for IHC     |
| rabbit anti ZEB1           | Sigma, #HPA027524                 | 1:5000, 1:600 | for IB, IHC |
| goat-anti-rabbit Alexa 488 | MolProbes, #A11-008               | 1:500         | for IF      |

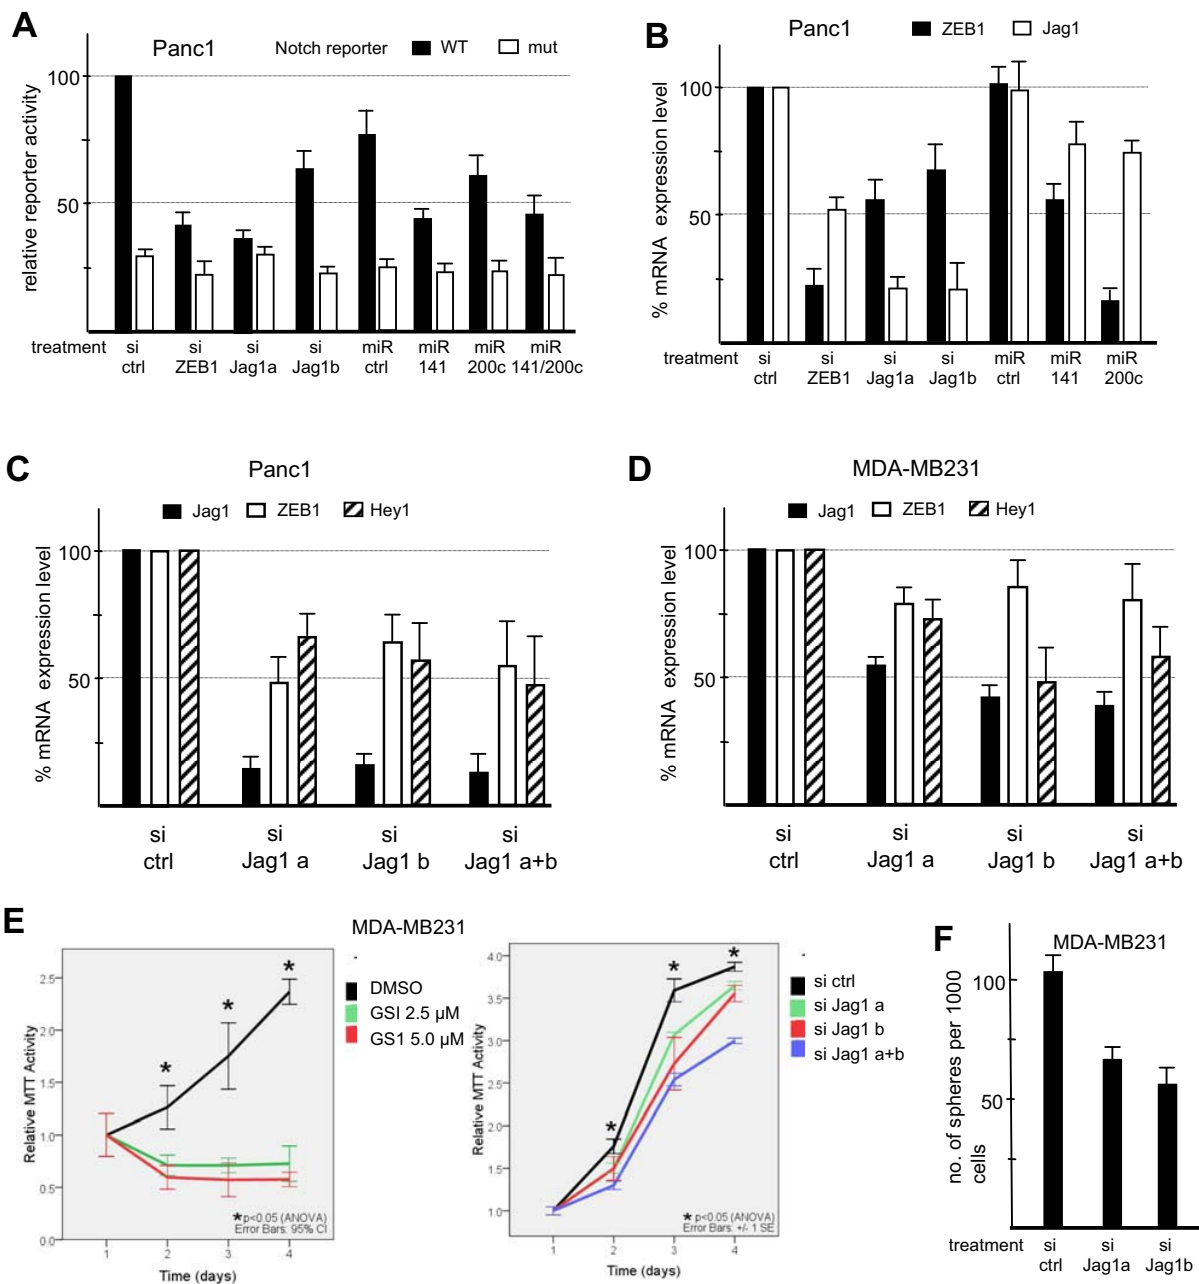

Brabletz et al., suppl. Fig. 1

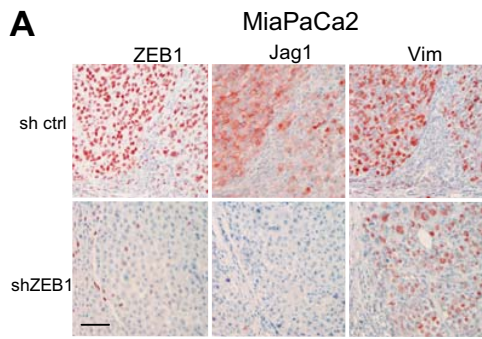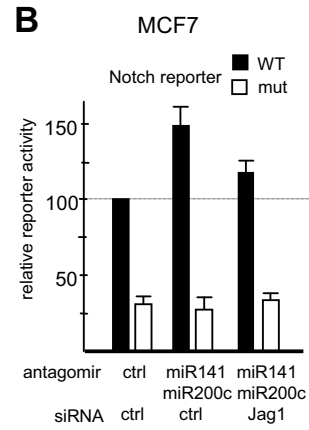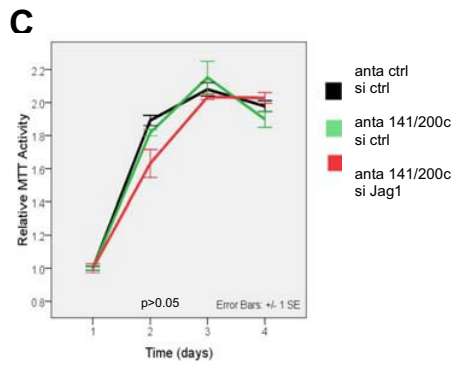

**D**

|                                                    | n  | ZEB1 +  | correlated Jag1        |
|----------------------------------------------------|----|---------|------------------------|
| basal type breast cancers                          | 8  | 6 (75%) | 6/6 (100%)<br>p < 0.05 |
| undifferentiated (G3-4) pancreatic adenocarcinomas | 12 | 8 (67%) | 7/8 (87%)<br>p < 0.05  |
